# Supplementary material for: Mental Health Treatment Among Individuals Involved in the Criminal Justice System After Implementation of the Affordable Care Act
Source: Atypon-hosted journal article supplement (doi:10.1176/appi.ps.201800559), 2019-05-29
Supplement: appi.ps.201800559.ds001.pdf [file appi.ps.201800559.ds001.pdf]

**Appendix****Appendix Table 1:** Insurance coverage and mental health treatment outcomes among people with serious psychological distress and without past year criminal justice involvement in the United States adjusted for possible confounders<sup>a</sup>, 2011-2017

| <b>Outcome</b>                                            | <b>2011-2013</b> |           | <b>2014-2017</b> |           | <b>Difference btw 2011-2013 and 2014-2017</b> |        |
|-----------------------------------------------------------|------------------|-----------|------------------|-----------|-----------------------------------------------|--------|
|                                                           | Weighted %       | 95% CI    | Weighted %       | 95% CI    | percentage point (pp)                         | p      |
| <b>Insurance coverage</b>                                 | 61%              | 57% - 65% | 74%              | 72% - 77% | 13.4 pp                                       | <0.001 |
| <b>Medicaid coverage</b>                                  | 25%              | 22% - 29% | 37%              | 34% - 41% | 11.9 pp                                       | <0.001 |
| <b>Private insurance coverage</b>                         | 24%              | 21% - 27% | 29%              | 26% - 31% | 4.7 pp                                        | 0.03   |
| <b>Other insurance coverage</b>                           | 11%              | 9% - 14%  | 8%               | 6% - 10%  | 3.3 pp                                        | 0.03   |
| <b>Any Mental Health Treatment</b>                        | 51%              | 47% - 54% | 47%              | 44% - 51% | -3.4 pp                                       | 0.14   |
| <b>Mental Health Treatment types</b>                      |                  |           |                  |           |                                               |        |
| <b>Inpatient</b>                                          | 12%              | 10% - 15% | 10%              | 8% - 11%  | -2.5 pp                                       | 0.10   |
| <b>Outpatient</b>                                         | 31%              | 28% - 34% | 29%              | 26% - 32% | -2.0 pp                                       | 0.35   |
| <b>Pharmacological Treatment</b>                          | 44%              | 40% - 47% | 40%              | 36% - 42% | -4.6 pp                                       | 0.04   |
| <b>Unmet Mental Health Needs</b>                          | 33%              | 20% - 37% | 32%              | 30% - 25% | -0.9 pp                                       | 0.69   |
| <b>Unmet Mental Health Needs due to Financial Reasons</b> | 61%              | 55% - 67% | 49%              | 43% - 54% | -12.3 pp                                      | 0.002  |
| <b>Reported Payers for Mental Health Treatment</b>        |                  |           |                  |           |                                               |        |
| <b>Medicaid</b>                                           | 25%              | 19% - 32% | 30%              | 25% - 35% | 4.5 pp                                        | 0.26   |
| <b>Self or Family</b>                                     | 27%              | 22% - 32% | 23%              | 18% - 28% | -3.3 pp                                       | 0.32   |

<sup>a</sup> - marginal estimates adjusted for age, gender, race/ethnicity, urban/rural location, marital status, and poverty level

**Appendix Table 2.** Insurance coverage and mental health treatment outcomes among people with serious psychological distress and past year criminal justice involvement living at or below 200% federal poverty level in the United States, 2011-2017<sup>b</sup>

| Outcome                            | 2011-2013  |           | 2014-2017  |           | Difference btw 2011-2013 and 2014-2017 |        |
|------------------------------------|------------|-----------|------------|-----------|----------------------------------------|--------|
|                                    | Weighted % | 95% CI    | Weighted % | 95% CI    | percentage point (pp)                  | p      |
| <b>Insurance coverage</b>          | 55%        | 50% - 61% | 72%        | 69% - 75% | 16.4 pp                                | <0.001 |
| <b>Any Mental Health Treatment</b> | 50%        | 45% - 54% | 49%        | 45% - 53% | -0.6 pp                                | 0.21   |

<sup>b</sup> - marginal estimates adjusted for age, gender, race/ethnicity, urban/rural location, marital status, and poverty level

**Appendix Table 3.** Proportion with insurance coverage and any mental health treatment among people with any mental illness and past year criminal justice involvement in the United States, 2011-2017<sup>c</sup>

| Outcome                            | 2011-2013  |           | 2014-2017  |           | Difference btw 2011-2013 and 2014-2017 |        |
|------------------------------------|------------|-----------|------------|-----------|----------------------------------------|--------|
|                                    | Weighted % | 95% CI    | Weighted % | 95% CI    | percentage point (pp)                  | p      |
| <b>Insurance coverage</b>          | 62%        | 58% - 66% | 74%        | 72% - 77% | 12.2 pp                                | <0.001 |
| <b>Any Mental Health Treatment</b> | 48%        | 44% - 51% | 47%        | 45% - 50% | -0.3 pp                                | 0.86   |

<sup>c</sup> - marginal estimates adjusted for age, gender, race/ethnicity, urban/rural location, marital status, and poverty level

**Appendix Table 4.** Insurance coverage and mental health treatment outcomes among people with serious mental illness and past year criminal justice involvement in the United States, 2011-2017<sup>d</sup>

| Outcome                            | 2011-2013  |           | 2014-2017  |           | Difference btw 2011-2013 and 2014-2017 |       |
|------------------------------------|------------|-----------|------------|-----------|----------------------------------------|-------|
|                                    | Weighted % | 95% CI    | Weighted % | 95% CI    | percentage point (pp)                  | p     |
| <b>Insurance coverage</b>          | 61%        | 54% - 67% | 75%        | 70% - 80% | 14.1 pp                                | 0.001 |
| <b>Any Mental Health Treatment</b> | 67%        | 60% - 73% | 66%        | 62% - 71% | -0.3 pp                                | 0.94  |

<sup>d</sup> - marginal estimates adjusted for age, gender, race/ethnicity, urban/rural location, marital status, and poverty level
